# Supplementary material for: Alum Addition Triggers Hypoxia in an Engineered Pit Lake
Source: MDPI journal article supplement (doi:10.3390/microorganisms10030510), 2022-02-26
Supplement: s1 [file s1]

## Supplementary materials

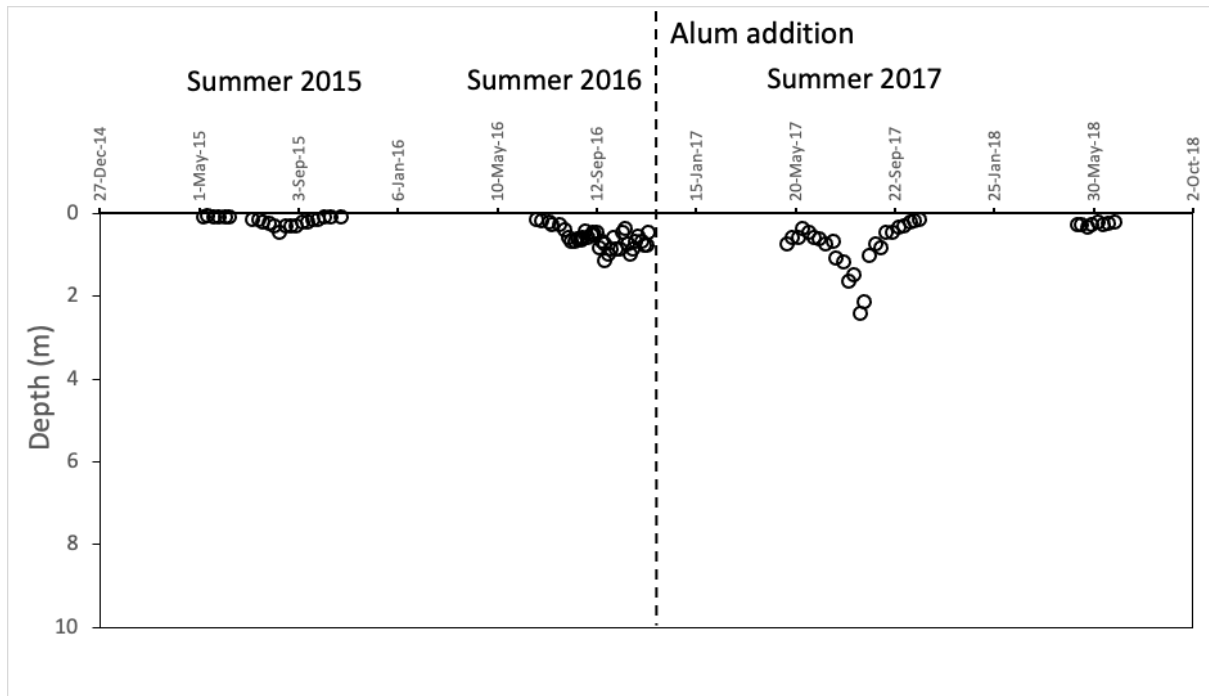

Figure S1. Time series of changes in light penetration (Secchi disk depths). Data from HATFIELD monitoring Program.

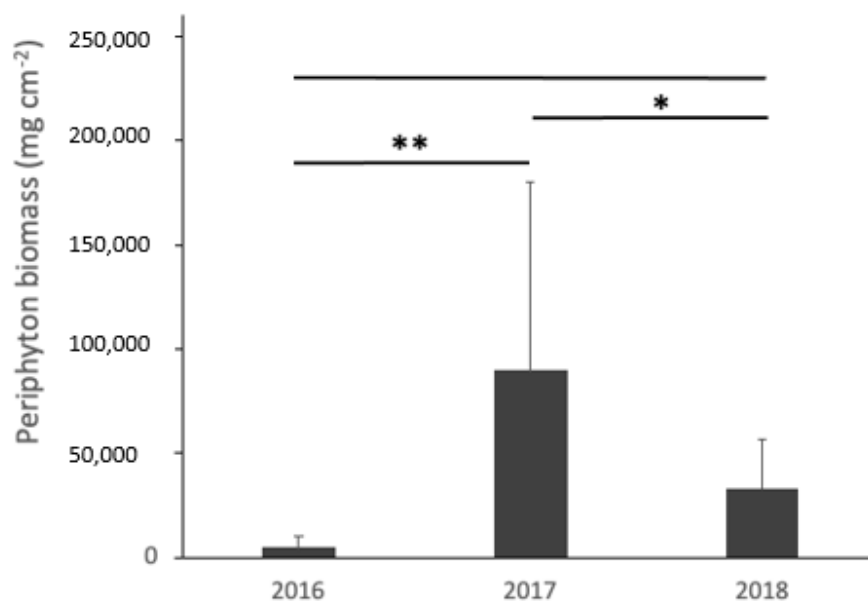

Figure S2. Averages (+S.D.) of total periphyton biomass for BML (28-day colonization experiment at peak summer) showing differences in biomass between years (ANOVA  $F(2, 33) = 7.68, p < 0.01$ , Tukey Post-hoc Test, \*  $p$ -value  $< 0.05$ , \*\*  $p$ -value  $< 0.01$ ). Data from and methods from HATFIELD monitoring Program. Periphyton colonization and growth rates were monitored on artificial substrates. Frosted glass slides ( $7.60 \times 2.54 \times 0.10$  cm) were placed in floating plastic trays and deployed approximately 0.15 m below the water surface and secured to the platform in the highest sunlight-receiving orientation. Two floating trays were deployed and four glass slides were added to each tray at one-week intervals (e.g., July 31, August 7, 14, and 21, 2018); each floating tray held 16 glass slides at the culmination of sampling. Biovolume ( $\mu\text{m}^3$ ) of each alga was estimated from the average organism dimensions and related to geometric shapes using a  $630\times$  magnification factor. The average biovolume of each cell was converted to biomass for all individual periphyton taxa assuming a specific gravity of 1 (i.e.,  $1 \mu\text{m}^3 = 1 \mu\text{g}$ ). Total sample biomass (wet weight) for each taxon was calculated using the equation: Total Biomass ( $\mu\text{g}/\text{cm}^2$ ) = Average Biomass ( $\mu\text{g}/\text{cell}$ )  $\times$  Total Abundance ( $\text{cells}/\text{cm}^2$ ).

Table S1. Organic phosphorus for BML. Data from HATFIELD monitoring program.

| Depth (m) | Porg (mg L <sup>-1</sup> ) |        |
|-----------|----------------------------|--------|
|           | 2016                       | 2017   |
| 0.3       | 0.0020                     | 0.0020 |
| 2         | 0.0020                     | 0.0020 |
| 4         | 0.0020                     | 0.0020 |
| 6         | 0.0025                     | 0.0022 |
| 8         | 0.0020                     | 0.0020 |
| 9         | 0.0026                     |        |
| 9.75      |                            | 0.0039 |

Table S2. Richness (based on ASVs) and diversity (inverse Simpson) for BML.

| Depth (m) | ASVs |      |      | inv<br>Simpson |      |      |
|-----------|------|------|------|----------------|------|------|
|           | 2016 | 2017 | 2018 | 2016           | 2017 | 2018 |
| 0         | 218  | 300  | 287  | 45.8           | 16.6 | 18.6 |
| 1.5       | 361  | 352  | 326  | 49.8           | 14.4 | 24.8 |
| 4.5       | 253  | 429  | 263  | 44.0           | 16.3 | 32.7 |
| 5.5       | 221  | 402  |      | 47.2           | 16.3 |      |
| 6         | 228  |      |      | 18.2           |      |      |
| 6.5       | 476  | 470  |      | 32.2           | 23.9 |      |
| 7.5       |      | 417  |      |                | 16.9 |      |
| 7.75      |      | 428  |      |                | 30.1 |      |
| 8 – 8.75  |      | 476  | 525  |                | 33.6 | 20.0 |
| 9.3-9.75  | 348  | 556  | 497  | 32.5           | 27.4 | 11.4 |
| 10.5      |      |      | 359  |                |      | 6.6  |
